# Supplementary material for: Effect of substitution of B-sites by Mn, Fe and Co in double perovskite-type Ba3CaNb2O9 on structure and electrical properties
Source: Royal Society of Chemistry journal article supplement (doi:10.1039/c3ra44429e), 2013-01-01
Supplement: c3ra44429e.pdf [file c3ra44429e.pdf]

## Effect of Substitution of *B*-sites by Mn, Fe and Co in Double Perovskite-type $\text{Ba}_3\text{CaNb}_2\text{O}_9$ on Structure and Electrical Properties

Wang Hay Kan,<sup>a</sup> Milad Roushanafshar,<sup>b</sup> Adrien Vincent,<sup>b</sup> Tobias Fürstenhaupt,<sup>a</sup> Masood Parvez,<sup>a</sup> Jingli. Luo,<sup>b</sup> Venkataraman Thangadurai<sup>\*a</sup>

<sup>a</sup> Department of Chemistry, University of Calgary, 2500 University Dr. NW, Calgary, AB, T2N 1N4, Phone: 001 403 210 8649; For correspondence; email: [vthangad@ucalgary.ca](mailto:vthangad@ucalgary.ca)

<sup>b</sup> Department of Chemical and Materials Engineering, University of Alberta, ECERF Building 7-084H, 107-116 Street, Edmonton, AB, Canada T6G 2 V4

### Supporting information

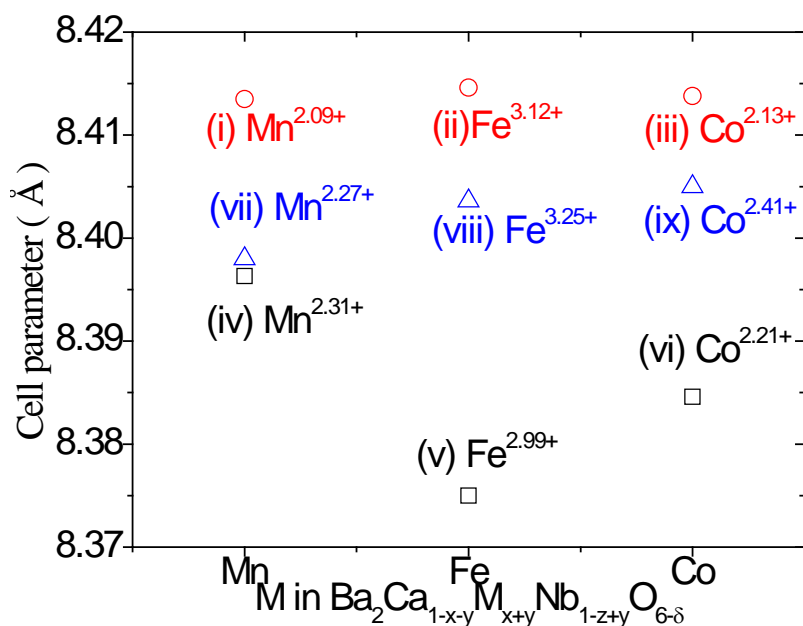

**Fig. S1.** The cell parameters of the as-prepared (i)  $\text{Ba}_2\text{Ca}_{0.79}\text{Mn}_{0.16}\text{Nb}_{1.05}\text{O}_{5.60}$ ; (ii)  $\text{Ba}_2\text{Ca}_{0.79}\text{Fe}_{0.16}\text{Nb}_{1.05}\text{O}_{5.68}$ ; (iii)  $\text{Ba}_2\text{Ca}_{0.79}\text{Co}_{0.16}\text{Nb}_{1.05}\text{O}_{5.61}$ ; (iv)  $\text{Ba}_2\text{Ca}_{0.67}\text{Mn}_{0.33}\text{NbO}_{5.55}$ ; (v)  $\text{Ba}_2\text{Ca}_{0.67}\text{Fe}_{0.33}\text{NbO}_{5.66}$ ; (vi)  $\text{Ba}_2\text{Ca}_{0.67}\text{Co}_{0.33}\text{NbO}_{5.53}$ ; (vii)  $\text{Ba}_2\text{Ca}_{0.79}\text{Mn}_{0.5}\text{Nb}_{0.71}\text{O}_{5.09}$ ; (viii)  $\text{Ba}_2\text{Ca}_{0.79}\text{Fe}_{0.5}\text{Nb}_{0.71}\text{O}_{5.35}$ ; (ix)  $\text{Ba}_2\text{Ca}_{0.79}\text{Co}_{0.5}\text{Nb}_{0.71}\text{O}_{5.10}$ .

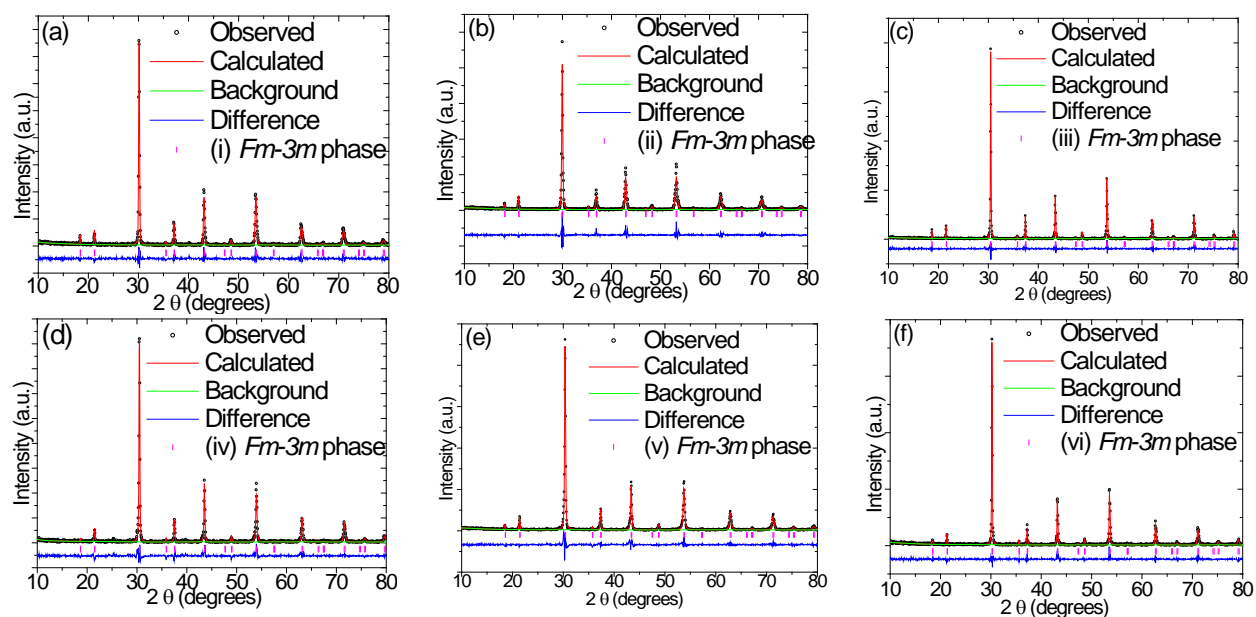

**Fig. S2.** Rietveld refinement of (a)  $\text{Ba}_2\text{Ca}_{0.79}\text{Mn}_{0.16}\text{Nb}_{1.05}\text{O}_{5.60}$  (i); (b)  $\text{Ba}_2\text{Ca}_{0.79}\text{Fe}_{0.16}\text{Nb}_{1.05}\text{O}_{5.68}$  (ii); (c)  $\text{Ba}_2\text{Ca}_{0.79}\text{Co}_{0.16}\text{Nb}_{1.05}\text{O}_{5.61}$  (iii), (d)  $\text{Ba}_2\text{Ca}_{0.67}\text{Mn}_{0.33}\text{NbO}_{5.55}$  (iv); (e)  $\text{Ba}_2\text{Ca}_{0.67}\text{Fe}_{0.33}\text{NbO}_{5.66}$  (v) and (f)  $\text{Ba}_2\text{Ca}_{0.67}\text{Co}_{0.33}\text{NbO}_{5.53}$  (vi), after explored in 5000 ppm  $\text{H}_2\text{S}/\text{H}_2$  at 600 °C for 12h.

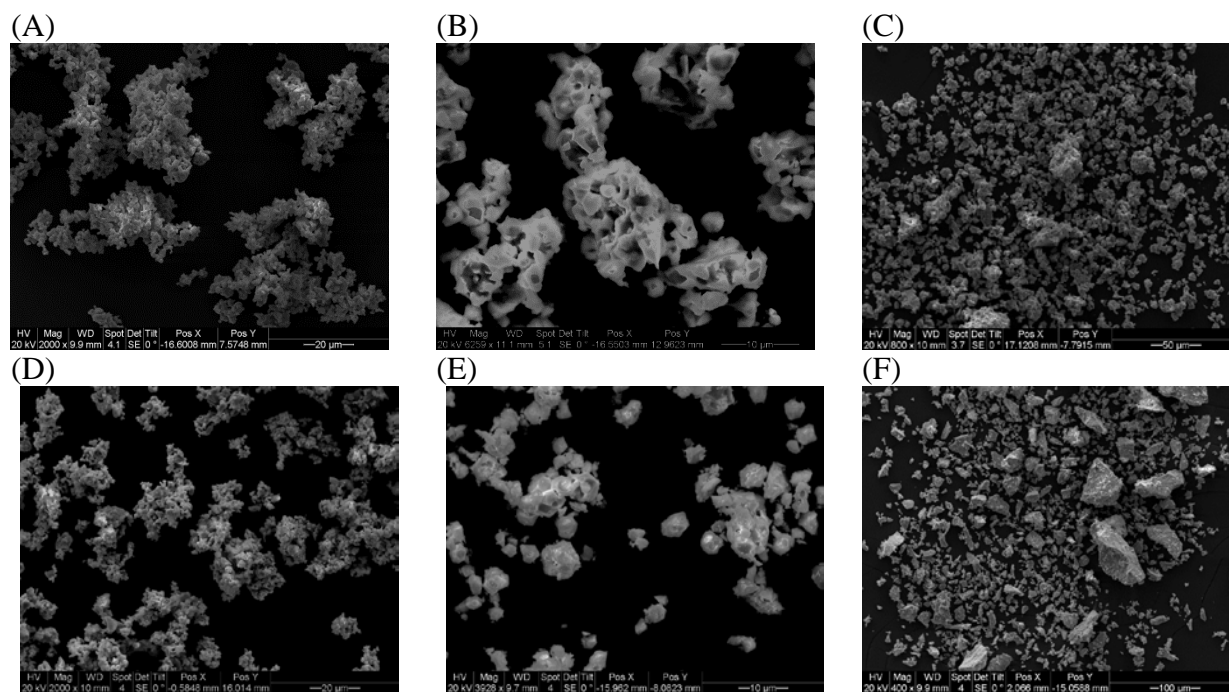

**Fig. S3.** Scanning electron microscopy (SEM) images of the representative as-prepared samples (A)  $\text{Ba}_2\text{Ca}_{0.79}\text{Mn}_{0.16}\text{Nb}_{1.05}\text{O}_{5.60}$ ; (B)  $\text{Ba}_2\text{Ca}_{0.79}\text{Fe}_{0.16}\text{Nb}_{1.05}\text{O}_{5.68}$ ; (C)  $\text{Ba}_2\text{Ca}_{0.79}\text{Co}_{0.16}\text{Nb}_{1.05}\text{O}_{5.61}$ , (D)  $\text{Ba}_2\text{Ca}_{0.67}\text{Mn}_{0.33}\text{NbO}_{5.55}$ ; (E)  $\text{Ba}_2\text{Ca}_{0.67}\text{Fe}_{0.33}\text{NbO}_{5.66}$ ; and (F)  $\text{Ba}_2\text{Ca}_{0.67}\text{Co}_{0.33}\text{NbO}_{5.53}$ , after explored in 5000 ppm  $\text{H}_2\text{S}/\text{H}_2$  at 600 °C for 12h.

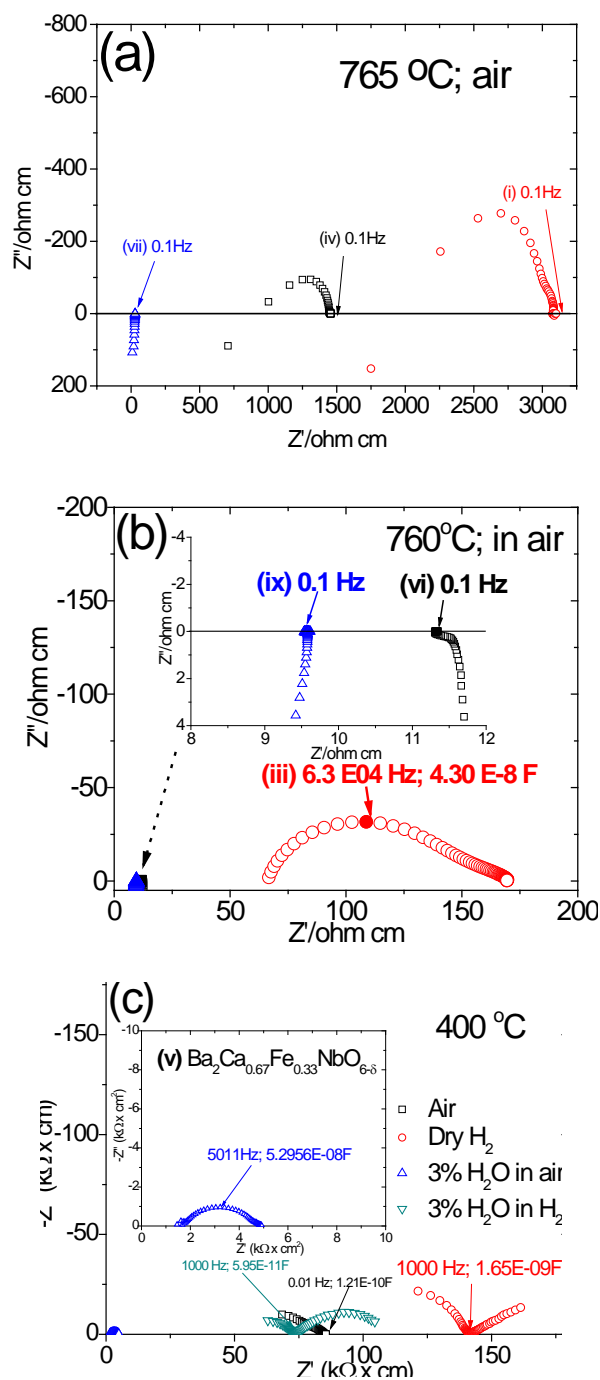

**Fig. S4.** The electrochemical impedance spectra of (a)  $\text{Ba}_2\text{Ca}_{0.79}\text{Mn}_{0.16}\text{Nb}_{1.05}\text{O}_{5.60}$  (i),  $\text{Ba}_2\text{Ca}_{0.67}\text{Mn}_{0.33}\text{NbO}_{5.55}$  (iv) and  $\text{Ba}_2\text{Ca}_{0.79}\text{Mn}_{0.5}\text{Nb}_{0.71}\text{O}_{5.09}$  (vii), in air at 760 °C; (b)  $\text{Ba}_2\text{Ca}_{0.79}\text{Co}_{0.16}\text{Nb}_{1.05}\text{O}_{5.61}$  (iii),  $\text{Ba}_2\text{Ca}_{0.67}\text{Co}_{0.33}\text{NbO}_{5.53}$  (vi) and  $\text{Ba}_2\text{Ca}_{0.79}\text{Co}_{0.5}\text{Nb}_{0.71}\text{O}_{5.10}$  (ix), in air at 765 °C and (c)  $\text{Ba}_2\text{Ca}_{0.67}\text{Fe}_{0.33}\text{NbO}_{5.66}$  (v) in air, wet air, dry  $\text{H}_2$  and wet  $\text{H}_2$  at 400 °C.

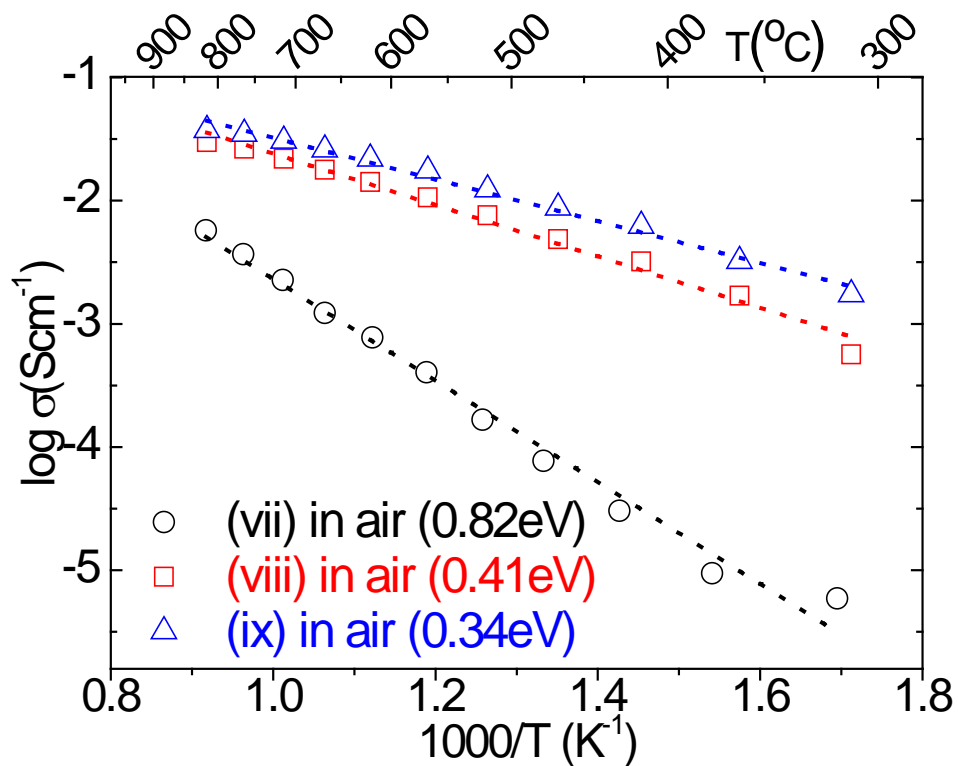

**Fig. S5.** The Arrhenius plot of  $\text{Ba}_2\text{Ca}_{0.79}\text{Mn}_{0.5}\text{Nb}_{0.71}\text{O}_{5.09}$  (vii),  $\text{Ba}_2\text{Ca}_{0.79}\text{Fe}_{0.5}\text{Nb}_{0.71}\text{O}_{5.09}$  (viii) and  $\text{Ba}_2\text{Ca}_{0.79}\text{Co}_{0.5}\text{Nb}_{0.71}\text{O}_{5.09}$  (ix) in air.

**Table S1.** The EDX analysis of the as-prepared (i-ix)  $\text{Ba}_2(\text{Ca}_{1-x-y}\text{M}_x\text{Nb}_y)(\text{Nb}_{1-z}\text{M}_z)\text{O}_{6-\delta}$  where M = Mn, Fe, Co.

| Compounds                                                                    | Cations | Experimental (As-prepared) | Theoretical |
|------------------------------------------------------------------------------|---------|----------------------------|-------------|
| $\text{Ba}_2\text{Ca}_{0.79}\text{Mn}_{0.16}\text{Nb}_{1.05}\text{O}_{5.60}$ | Ba      | 10.66                      | 12.5        |
|                                                                              | Ca      | 3.76                       | 4.94        |
|                                                                              | Nb      | 7.73                       | 6.56        |
|                                                                              | Mn      | 1                          | 1           |
| $\text{Ba}_2\text{Ca}_{0.79}\text{Fe}_{0.16}\text{Nb}_{1.05}\text{O}_{5.68}$ | Ba      | 12.16                      | 12.5        |
|                                                                              | Ca      | 4.47                       | 4.94        |
|                                                                              | Nb      | 6.47                       | 6.56        |
|                                                                              | Fe      | 1                          | 1           |
| $\text{Ba}_2\text{Ca}_{0.79}\text{Co}_{0.16}\text{Nb}_{1.05}\text{O}_{5.61}$ | Ba      | 10.96                      | 12.5        |
|                                                                              | Ca      | 4.27                       | 4.94        |
|                                                                              | Nb      | 7.27                       | 6.56        |
|                                                                              | Co      | 1                          | 1           |
| $\text{Ba}_2\text{Ca}_{0.67}\text{Mn}_{0.33}\text{NbO}_{5.55}$               | Ba      | 6.94                       | 6.06        |
|                                                                              | Ca      | 1.96                       | 2.03        |
|                                                                              | Nb      | 5.05                       | 3.03        |
|                                                                              | Mn      | 1                          | 1           |
| $\text{Ba}_2\text{Ca}_{0.67}\text{Fe}_{0.33}\text{NbO}_{5.66}$               | Ba      | 6.60                       | 6.06        |
|                                                                              | Ca      | 2.04                       | 2.03        |
|                                                                              | Nb      | 3.01                       | 3.03        |
|                                                                              | Fe      | 1                          | 1           |
| $\text{Ba}_2\text{Ca}_{0.67}\text{Co}_{0.33}\text{NbO}_{5.53}$               | Ba      | 6.72                       | 6.06        |
|                                                                              | Ca      | 1.94                       | 2.03        |
|                                                                              | Nb      | 4.01                       | 3.03        |
|                                                                              | Co      | 1                          | 1           |
| $\text{Ba}_2\text{Ca}_{0.79}\text{Mn}_{0.5}\text{Nb}_{0.71}\text{O}_{5.09}$  | Ba      | 3.76                       | 4           |
|                                                                              | Ca      | 1.29                       | 1.58        |
|                                                                              | Nb      | 2.33                       | 1.42        |
|                                                                              | Mn      | 1                          | 1           |
| $\text{Ba}_2\text{Ca}_{0.79}\text{Fe}_{0.5}\text{Nb}_{0.71}\text{O}_{5.35}$  | Ba      | 4.14                       | 4           |
|                                                                              | Ca      | 1.50                       | 1.58        |
|                                                                              | Nb      | 1.3                        | 1.42        |
|                                                                              | Fe      | 1                          | 1           |
| $\text{Ba}_2\text{Ca}_{0.79}\text{Co}_{0.5}\text{Nb}_{0.71}\text{O}_{5.10}$  | Ba      | 4.55                       | 4           |
|                                                                              | Ca      | 1.51                       | 1.58        |
|                                                                              | Nb      | 2.19                       | 1.42        |
|                                                                              | Co      | 1                          | 1           |

**Table S2.** The cell parameters of the as-prepared (i)  $\text{Ba}_2\text{Ca}_{0.79}\text{Mn}_{0.16}\text{Nb}_{1.05}\text{O}_{5.60}$ ; (ii)  $\text{Ba}_2\text{Ca}_{0.79}\text{Fe}_{0.16}\text{Nb}_{1.05}\text{O}_{5.68}$ ; (iii)  $\text{Ba}_2\text{Ca}_{0.79}\text{Co}_{0.16}\text{Nb}_{1.05}\text{O}_{5.61}$ , (iv)  $\text{Ba}_2\text{Ca}_{0.67}\text{Mn}_{0.33}\text{NbO}_{5.55}$ ; (v)  $\text{Ba}_2\text{Ca}_{0.67}\text{Fe}_{0.33}\text{NbO}_{5.66}$  and (vi)  $\text{Ba}_2\text{Ca}_{0.67}\text{Co}_{0.33}\text{NbO}_{5.53}$  after heat treatment in 5000 ppm  $\text{H}_2\text{S}/\text{H}_2$  at 600 °C for 12 h.

| Compounds                                                                    | Cell parameters |                                                   |
|------------------------------------------------------------------------------|-----------------|---------------------------------------------------|
|                                                                              | As-prepared     | 5000 ppm $\text{H}_2\text{S}/\text{H}_2$ at 600°C |
| $\text{Ba}_2\text{Ca}_{0.79}\text{Mn}_{0.16}\text{Nb}_{1.05}\text{O}_{5.60}$ | 8.4135(5) Å     | 8.420 (1) Å                                       |
| $\text{Ba}_2\text{Ca}_{0.79}\text{Fe}_{0.16}\text{Nb}_{1.05}\text{O}_{5.68}$ | 8.4146(2) Å     | 8.4341(9) Å                                       |
| $\text{Ba}_2\text{Ca}_{0.79}\text{Co}_{0.16}\text{Nb}_{1.05}\text{O}_{5.61}$ | 8.4138 (3) Å    | 8.4231(5) Å                                       |
| $\text{Ba}_2\text{Ca}_{0.67}\text{Mn}_{0.33}\text{NbO}_{5.55}$               | 8.3963(7) Å     | 8.3940(7) Å                                       |
| $\text{Ba}_2\text{Ca}_{0.67}\text{Fe}_{0.33}\text{NbO}_{5.66}$               | 8.3750(2) Å     | 8.3956(8) Å                                       |
| $\text{Ba}_2\text{Ca}_{0.67}\text{Co}_{0.33}\text{NbO}_{5.53}$               | 8.3846(3) Å     | 8.3955(6) Å                                       |

**Table S3.** The EDX analysis of the as-prepared  $\text{Ba}_2\text{Ca}_{1-x-y}\text{M}_{x+z}\text{Nb}_{1-z+y}\text{O}_{6-\delta}$  (M = Mn, Fe and Co) after heat treatment in 5000 ppm  $\text{H}_2\text{S}/\text{H}_2$  at 600 °C for 12 h.

(i)  $\text{Ba}_2\text{Ca}_{0.79}\text{Mn}_{0.16}\text{Nb}_{1.05}\text{O}_{5.60}$ ; (ii)  $\text{Ba}_2\text{Ca}_{0.79}\text{Fe}_{0.16}\text{Nb}_{1.05}\text{O}_{5.68}$ ; (iii)  $\text{Ba}_2\text{Ca}_{0.79}\text{Co}_{0.16}\text{Nb}_{1.05}\text{O}_{5.61}$

| M    | (i) Mn | (ii) Fe | (iii) Co |
|------|--------|---------|----------|
| S K  | 0.08   | 0.42    | 0.0      |
| Ca K | 1.00   | 1.00    | 1.00     |
| Ba L | 2.98   | 3.29    | 2.60     |
| Nb L | 1.29   | 1.45    | 1.36     |
| M K  | 0.26   | 0.52    | 0.35     |

(iv)  $\text{Ba}_2\text{Ca}_{0.67}\text{Mn}_{0.33}\text{NbO}_{5.55}$ ; (v)  $\text{Ba}_2\text{Ca}_{0.67}\text{Fe}_{0.33}\text{NbO}_{5.66}$ ; (vi)  $\text{Ba}_2\text{Ca}_{0.67}\text{Co}_{0.33}\text{NbO}_{5.53}$

| M    | (iv) Mn | (v) Fe | (vi) Co |
|------|---------|--------|---------|
| S K  | 0.00    | 0.07   | 0.00    |
| Ca K | 1.00    | 1.00   | 1.00    |
| Ba L | 3.46    | 2.75   | 3.68    |
| Nb L | 2.05    | 1.55   | 1.98    |
| M K  | 0.36    | 0.04   | 0.54    |
